# Supplementary material
Source: PubMed Central journal article supplement (PMC4587695)
Supplement: ASN.2014070714_ASN2014070714SupplementaryData.pdf [file ASN.2014070714_ASN2014070714SupplementaryData.pdf]

| ICD-10-CA                     |                                                                                              |
|-------------------------------|----------------------------------------------------------------------------------------------|
| <b>CVD<sup>24</sup></b>       |                                                                                              |
| IHD                           | I20-I25                                                                                      |
| HF                            | I09.9, I11, I13, I25.5, I42.0, I42.5-I42.9, I43, I50, P29.0                                  |
| CVS                           | G45-G46, H34.0, I60-I69                                                                      |
| Arrhythmia                    | I44.1-I44.3, I45.6, I45.9, I46-149, R00.0, R00.1, R00.8, T82.1, Z45.0, Z95.0                 |
| Valvular heart disease        | I05-I10, I12, I34-I38                                                                        |
| Other                         | I26.9, I51.6, I70-I79, T82.0, T82.2                                                          |
| <b>Infection<sup>25</sup></b> |                                                                                              |
| Abdominal                     | A01-A04, A06-A09, B15-B19, K35-K38, K80-K82                                                  |
| Cardiac                       | I30.1, I40.0                                                                                 |
| Kidney/ genitourinary         | A50-A53, N11.0, N11.1, N39.0                                                                 |
| Neurological                  | A39, A83-A84, A85.2, G00-G02                                                                 |
| Respiratory                   | A16-A19, A37, J9-J18, J20-J22                                                                |
| Septicemia                    | A40-A41                                                                                      |
| Other                         | A00, A05, A20-A36, A38, A42-A44, A46, A48-A49, A54-A82, A85.0-A85.1, A85.8, A86-B09, B20-B99 |
| <b>Cancer</b>                 |                                                                                              |
| Malignant                     | C00-C97, D46                                                                                 |
| Non-malignant                 | D10-D36                                                                                      |
| <b>Other</b>                  |                                                                                              |
| Chronic lung disease          | J40-J67, J84.1                                                                               |
| Diabetes                      | E10-E15 excluding E1X.2                                                                      |

| ICD-10-CA                  |                                                     |
|----------------------------|-----------------------------------------------------|
| Neurological and dementias | F00-F04, G03-G99 excluding G45, G46 – cardiac (CVS) |
| Digestive                  | K00-K93 excluding K35-K38, K80-K82 - infection      |
| Suicide and accidents      | V- Y                                                |
| Other                      | every other code including typos                    |
| <b>Missing</b>             | missing codes                                       |
